# Supplementary material
Source: MDPI journal article supplement (https://www.mdpi.com/2077-0472/13/9/1651)

## Supplementary Materials

### 1. Questionnaire

**Topic: Does contract length matter? The impact of various contract farming regimes on land improvement investment and efficiency of contract farmers in Pakistan**

*The information provided will assist in the formulation of policies and programs that will improve contract farming and smallholders' income. The information will be treated with strict confidentiality.*

**a. Socio-demographic information** Questionnaire No. \_\_\_\_\_

Please specify your answer by placing a tick (✓) on the relevant from the answers provided.

1. Farmers name: \_\_\_\_\_ Village Name: \_\_\_\_\_

2. Household head age: \_\_\_\_\_ (years) Tehsil & District: \_\_\_\_\_

3. Household head education \_\_\_\_\_ No. of year Land tenure type: \_\_\_\_\_

4. Source of income

| <i>Income sources</i> | Rupees/month |
|-----------------------|--------------|
| Off-farm income       |              |
| Farm income           |              |
| Remittances           |              |
| Pension               |              |
| Others                |              |
| Total                 |              |

5. Land holding \_\_\_\_\_ total acre

(a) Rented \_\_\_\_\_ (b) Owned \_\_\_\_\_ (c) shared \_\_\_\_\_

6. Distance from the regulated (city) market \_\_\_\_\_ km

7. How long you are engaged in contract farming \_\_\_\_\_ years

8. Farming experience \_\_\_\_\_ years

9. Have you participated in training/skill development course programs related to agriculture?

(i) Yes ☐ (ii) No ☐

10. Do you have a cell phone?

(i) Yes ☐ (ii) No ☐

11. How long you are engaged in organic rice production? No of years:\_\_\_\_\_

12. Number of livestock heads \_\_\_\_\_(numbers)

### **b. Farm and crop specific information**

| No. | Variables                                                           | Response |
|-----|---------------------------------------------------------------------|----------|
| 1   | Last year's rice yield (Kg/ha)                                      |          |
| 2   | Last year's rice income per ha                                      |          |
| 3   | Farm logistic ownership                                             | Yes/No   |
| 4   | Are you a member of any farmer-based organization?                  | Yes/No   |
| 5   | Do you have a connection to a nearby input-output market?           | Yes/No   |
| 6   | Public-private partnership for organic rice production              | Yes/No   |
| 7   | Subsidy-financial incentive received                                | Yes/No   |
| 8   | Organic manure application (Kg/ha)                                  |          |
| 9   | Green manure application (Kg/ha)                                    |          |
| 10  | Improved seed used for last year rice crop                          | Yes/No   |
| 11  | Hired labor used                                                    | Yes/No   |
| 12  | Family labor employed on-farm                                       | Yes/No   |
| 13  | Crop rotation in practice                                           | Yes/No   |
| 14  | Do you use mechanical harvesting of rice?                           | Yes/No   |
| 15  | Do you own a tractor?                                               | Yes/No   |
| 16  | Number of tillage operations applied for last year rice cultivation |          |
| 17  | Tube well ownership                                                 | Yes/No   |

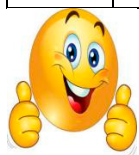

Thanks a lot for your participation.

Your time and opinions are greatly appreciated!

## 2. Distribution of dependent variable

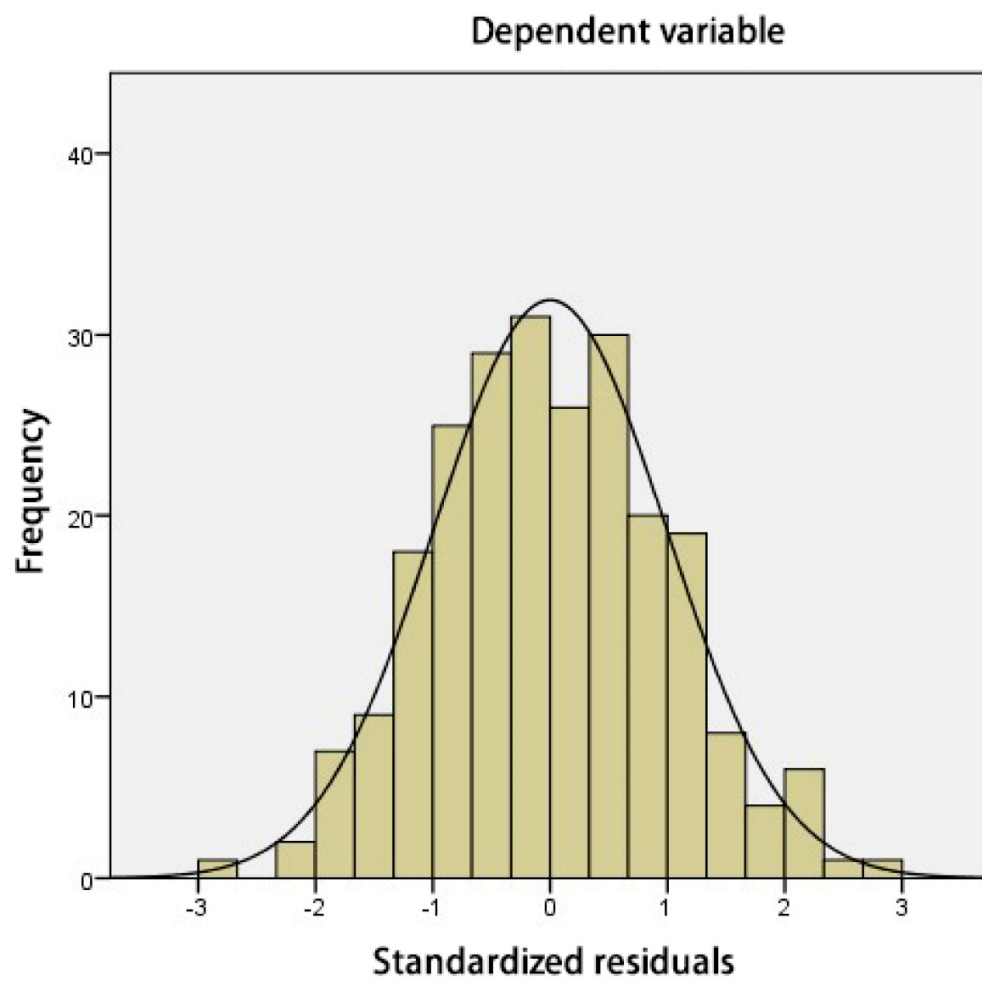

Supplement: s1 [file s1 › agriculture-2561235-supplementary.pdf]
